# Supplementary material for: Genetic insights into the social organization of Neanderthals
Source: Research Square preprint supplement (doi:10.21203/rs.3.rs-1382459/v1), 2024-02-22
Supplement: Supplementary file 1 [file 5f1c2ea6147f8922d817a322.docx]

Supplementary information

This file contains a detailed description of all analysis carried out in this study in Supplementary Information Sections 1-10, along with 42 Supplementary Figures, 44 Supplementary Tables and Supplementary References.

SIDataset1.xlsx

This file contains all information on the sequencing of libraries – including treatment and complexity of libraries and contamination estimates.
